# Supplementary material
Source: Springer Nature journal article supplement (https://www.springermedizin.de/resource/supplementary/12885_2010_2633_MOESM1_ESM.pdf/9461628)

**A**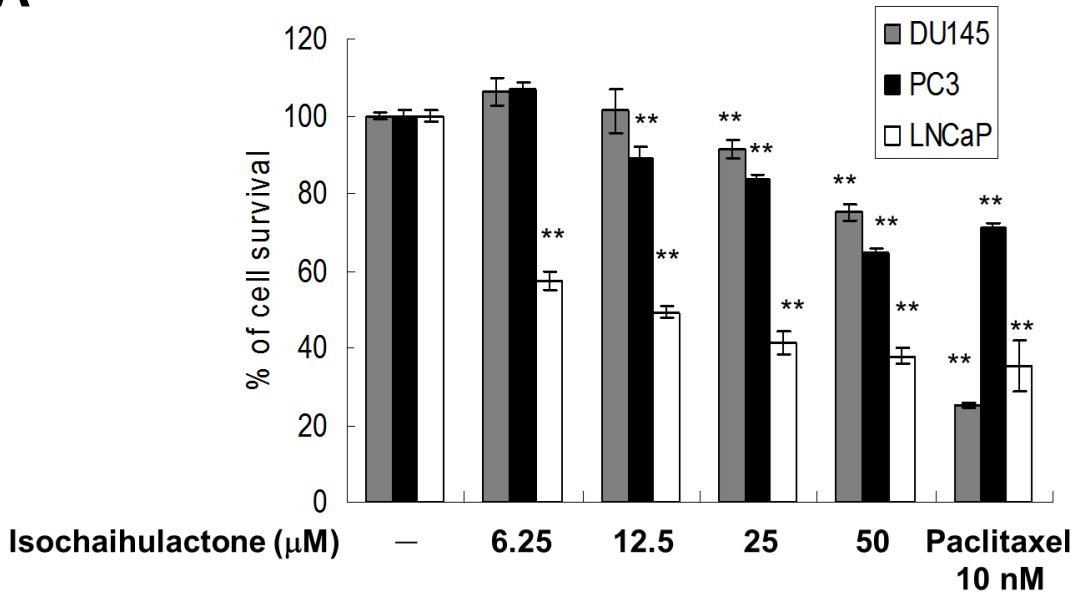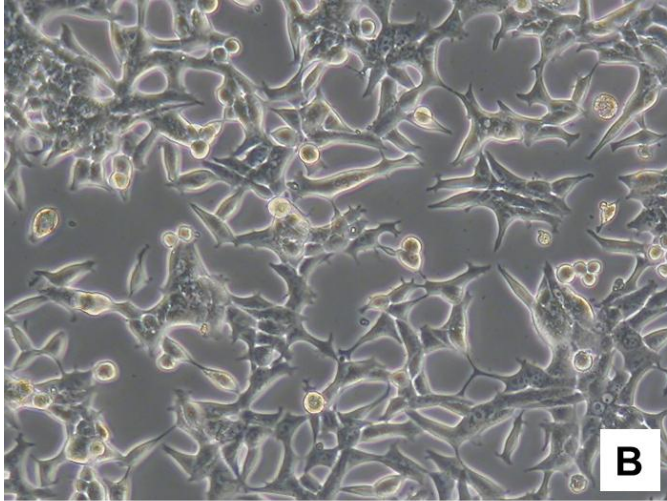

Control, 24 h, 100X

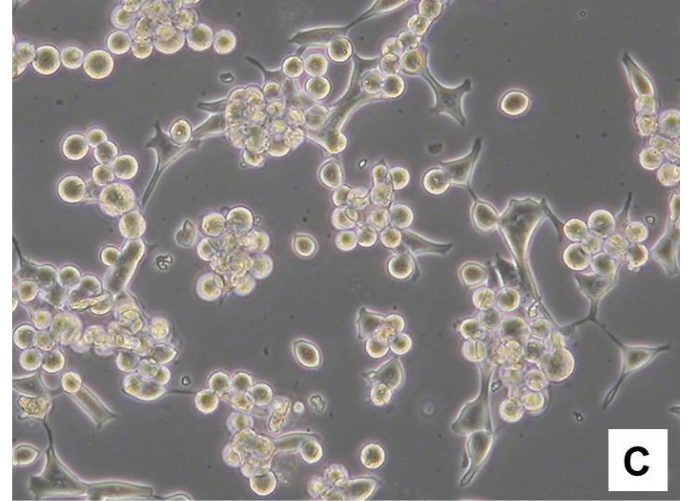Isochaihulactone (20  $\mu\text{M}$ ), 24 h, 100X**D**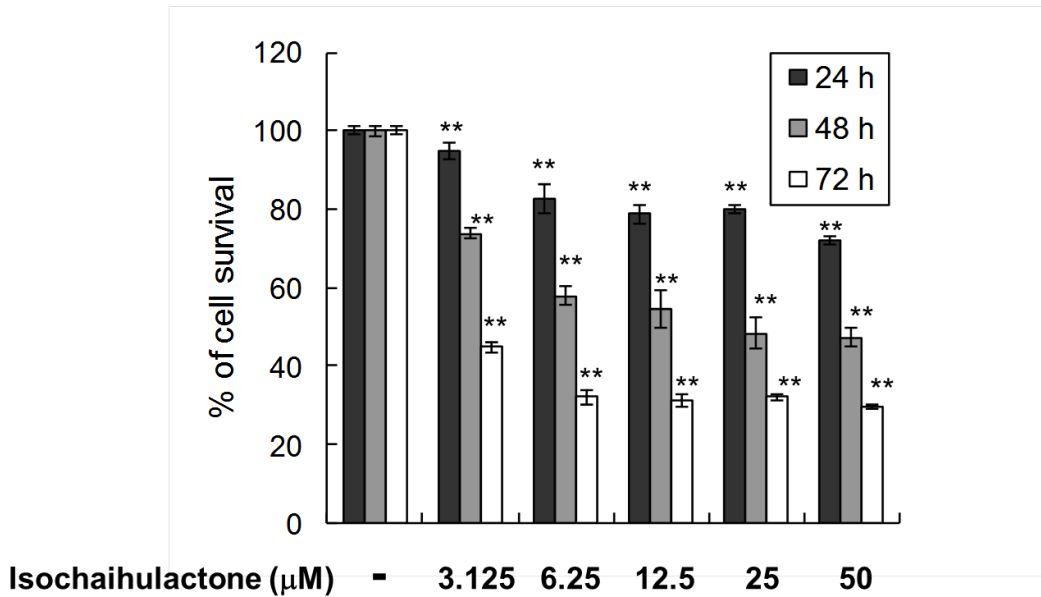

Supplement: MOESM1 [file 9461628]
